# Supplementary material for: Host Plant Selection Imprints Structure and Assembly of Fungal Community along the Soil-Root Continuum
Source: PubMed Central journal article supplement (PMC9426500; doi:10.1128/msystems.00361-22), 2022-08-09

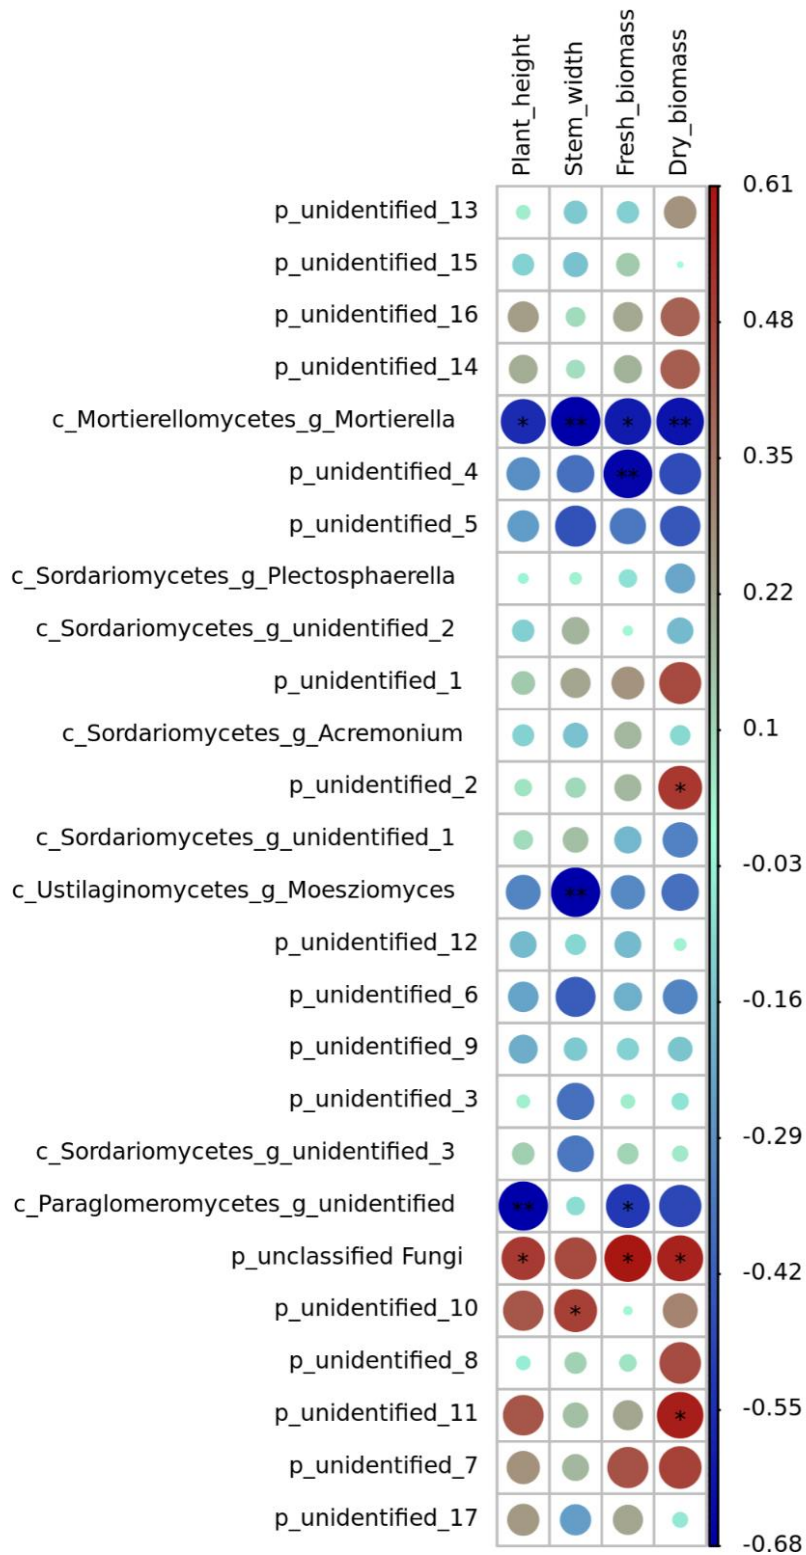

Supplement: msystems.00361-22-s0003.pdf [file msystems.00361-22-s0003.pdf]
